# Supplementary material
Source: PubMed Central journal article supplement (PMC522219)
Supplement: molcellb_24_21_9658__1.pdf [file molcellb_24_21_9658__1.pdf]

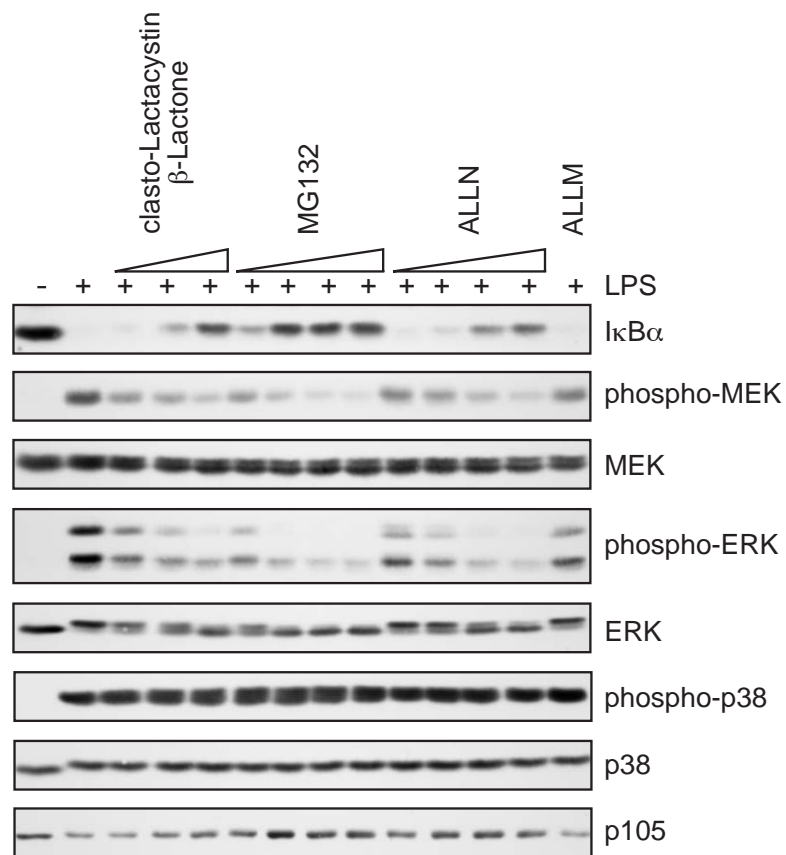

BMDMs were preincubated for 30min with the increasing concentrations of the proteasome inhibitors MG132 (0.6, 2.5, 10, 40 $\mu$ M; ), clasto-lactacystin  $\beta$ -lactone (0.6, 2.5, 10 $\mu$ M; Calbiochem) and ALLN (0.6, 2.5, 10, 40 $\mu$ M; Sigma), ALLM (40 $\mu$ M; Sigma) or DMSO vehicle control and then stimulated with LPS for 15min. Total cell lysates were Western blotted for the indicated proteins. LPS activation of endogenous MEK, ERK and p38 were monitored with the appropriate phospho-specific antibodies.

**Supplementary Figure**
